# Supplementary material
Source: publisher figshare collection journal article supplement (https://acs.figshare.com/ndownloader/files/22638521)
Supplement: Supplementary file 1 [file 22638521]

# **Supporting Information for “Decelerated Liquid Dynamics Induced by Component-Dependent Supercooling in Hydrogen and Deuterium Quantum Mixtures”**

Shutaro Yamaoka and Kim Hyeon-Deuk\*

*Department of Chemistry, Kyoto University, Kyoto, 606-8502, Japan*

E-mail: kim@kuchem.kyoto-u.ac.jp, Phone: +81-75-753-4021

---

\*To whom correspondence should be addressed

| Mixing Ratio        | Average Temperature |      |      |
|---------------------|---------------------|------|------|
| 0% D <sub>2</sub>   | 30.0                | 25.1 | 18.1 |
| 25% D <sub>2</sub>  | 30.0                | 25.0 | 17.9 |
| 50% D <sub>2</sub>  | 30.1                | 25.0 | 17.9 |
| 75% D <sub>2</sub>  | 30.1                | 24.9 | 18.0 |
| 100% D <sub>2</sub> | 30.0                | 24.9 | 18.1 |

Table S1: Average temperatures obtained by the the NVE (microcanonical) simulations.

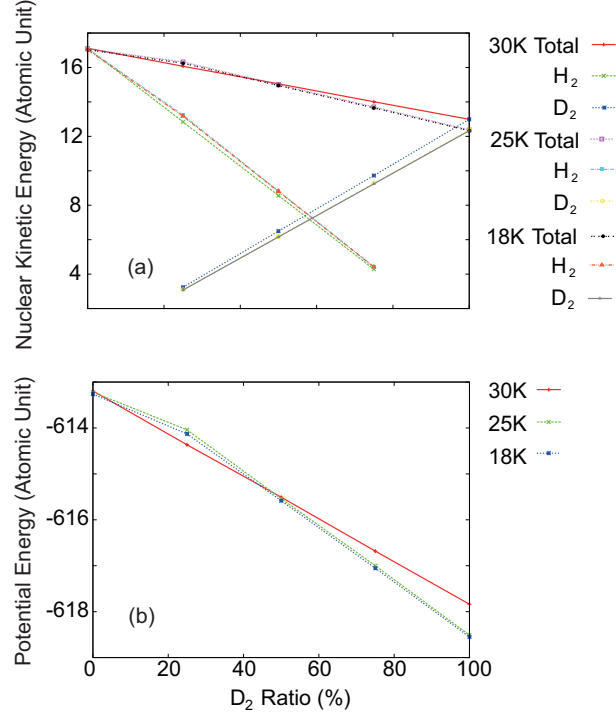

Figure S1: (a) Nuclear kinetic energies and (b) remaining potential energies. The nuclear kinetic energies, which originate from the kinetic energy operator, can be decomposed into the H<sub>2</sub> and D<sub>2</sub> contributions. The total nuclear kinetic energies almost monotonically decrease with increasing the D<sub>2</sub> mixing ratio because of the larger mass of D<sub>2</sub> molecules compared to H<sub>2</sub> molecules. The nuclear kinetic energies decomposed into each isotope essentially reflect the component ratio H<sub>2</sub>:D<sub>2</sub>; the nuclear kinetic energies of H<sub>2</sub> decreases while the nuclear kinetic energies of D<sub>2</sub> increases with increasing the D<sub>2</sub> mixing ratio. The potential energies including the internuclear interaction between H and D exhibit the similar dependence on the D<sub>2</sub> mixing ratio and temperature to the total nuclear kinetic energies. The lower potential energies with the higher D<sub>2</sub> mixing ratio imply that the current liquid states whose molar volume is close to the vapor-pressure molar volume of D<sub>2</sub> are more stable when more D<sub>2</sub> molecules are included especially at the lower temperatures.

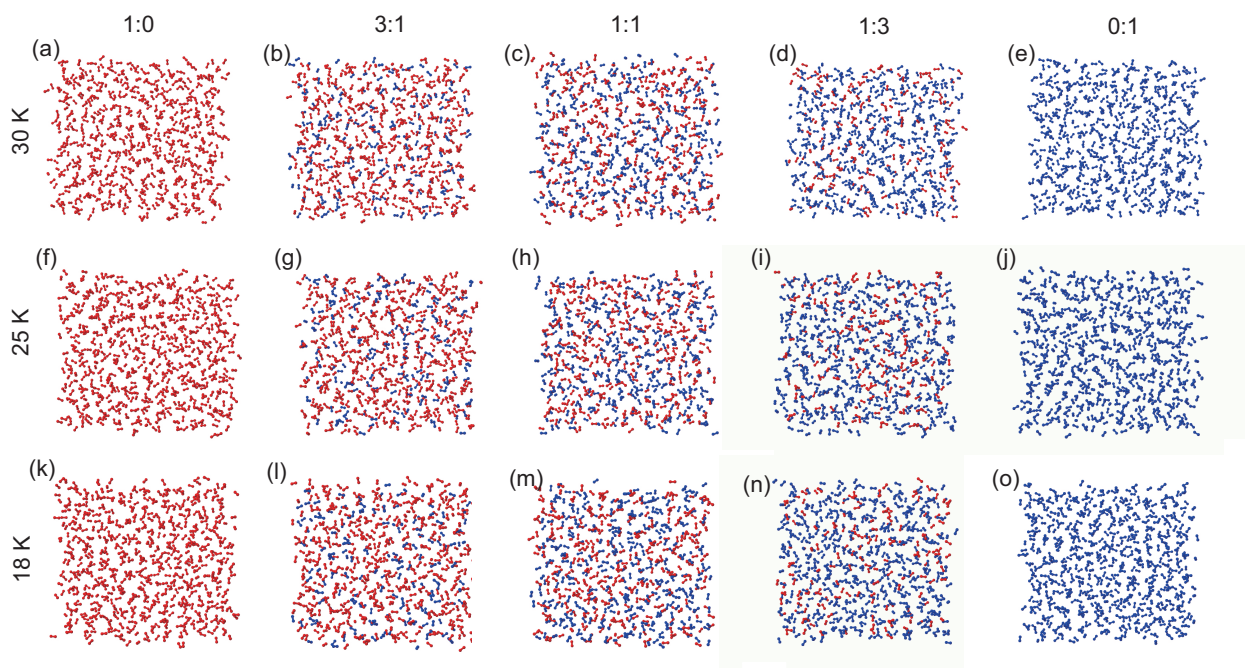

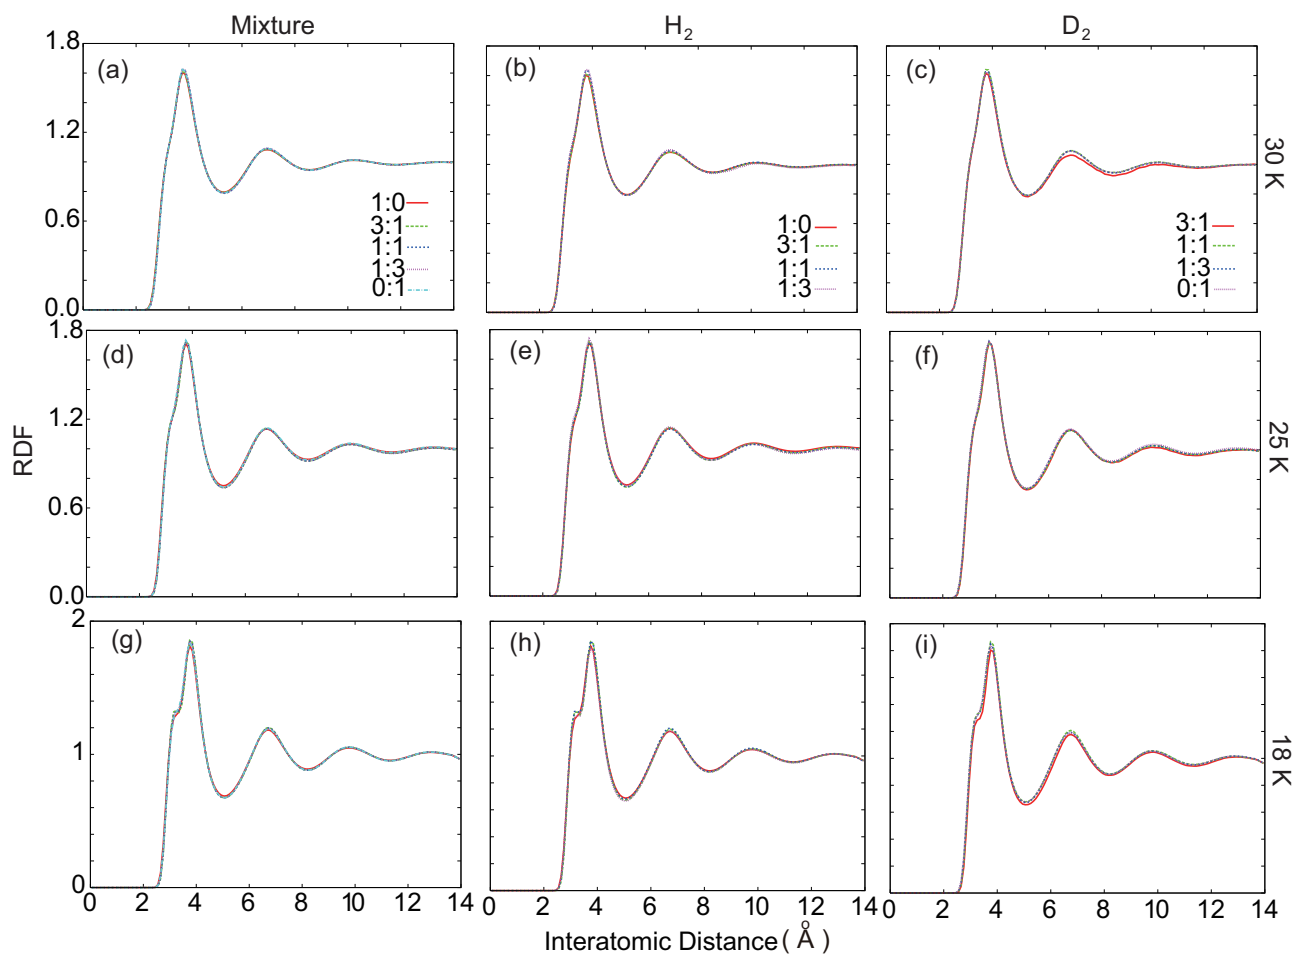

Figure S3: Radial distribution functions(RDFs) at (a)-(c) 30 K, (d)-(f) 25 K and (g)-(i) 18 K. The left panels show the whole shapes of the RDFs for the mixture including both of  $\text{H}_2$  and  $\text{D}_2$  while the center and right panels display the RDFs of only one component,  $\text{H}_2$  and  $\text{D}_2$ , respectively. The shoulders in the left part of the first RDF peaks, which become apparent at the low temperature regardless of the  $\text{D}_2$  ratio, reflect a diatomic structure of  $\text{H}_2$  and  $\text{D}_2$  in a first solvation shell. The most stable solvation structure of a pair of  $\text{H}_2$  and  $\text{D}_2$  is a T-shape configuration, and its nearest atoms appear as the shoulder especially at the low temperature due to smaller thermal modulations of molecules in a first solvation cage.<sup>1,2</sup>

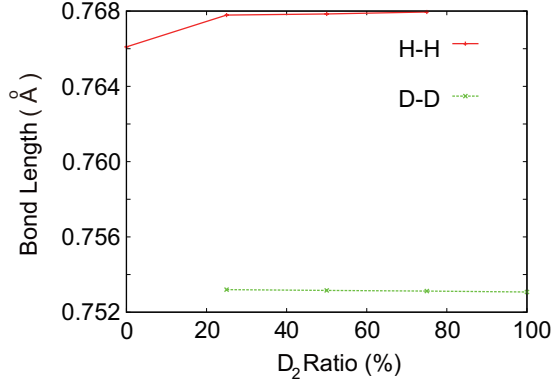

Figure S4: Average H-H and D-D bond length in the mixtures at 18 K. The H-H bond length becomes larger when D<sub>2</sub> molecules are mixed by 25 % because it is hard for light H<sub>2</sub> molecules to escape from the first solvation shell including heavy D<sub>2</sub> molecules; especially the present H<sub>2</sub> molecules are supercooled at 18 K and their mobility for escaping is suppressed. Further, mixing of D<sub>2</sub> molecules which have the shorter bond length and the smaller nuclear wave packet than H<sub>2</sub> molecules provides freer space for the H-H bond to stretch more compared to the pure H<sub>2</sub> liquid case. The D-D bond length slightly becomes longer with decreasing the D<sub>2</sub> ratio, *i.e.*, with increasing the H<sub>2</sub> ratio. As more light H<sub>2</sub> molecules surround a D<sub>2</sub> molecule in a solvation cage, it becomes easier for a D<sub>2</sub> molecule to push surrounding light H<sub>2</sub> molecules and stretch. The average bond length of isolated H<sub>2</sub> and D<sub>2</sub> molecules, which is purely determined by the intramolecular interaction including the isotope-dependent nuclear quantum effects, was calculated by the nuclear and electron wave packet molecular dynamics (NEWPMD) method as 0.76429 Å and 0.75163 Å, respectively.<sup>1,2</sup> Since the experimental bond length in a gas phase was measured as 0.7510 Å for H<sub>2</sub> and 0.7482 Å for D<sub>2</sub>, the difference between the computed and experimentally observed bond length is only 1.8% for H<sub>2</sub> and 0.5% for D<sub>2</sub>, which is surprising taking into account that the NEWPMD method does not include any empirical parameter or model potential.

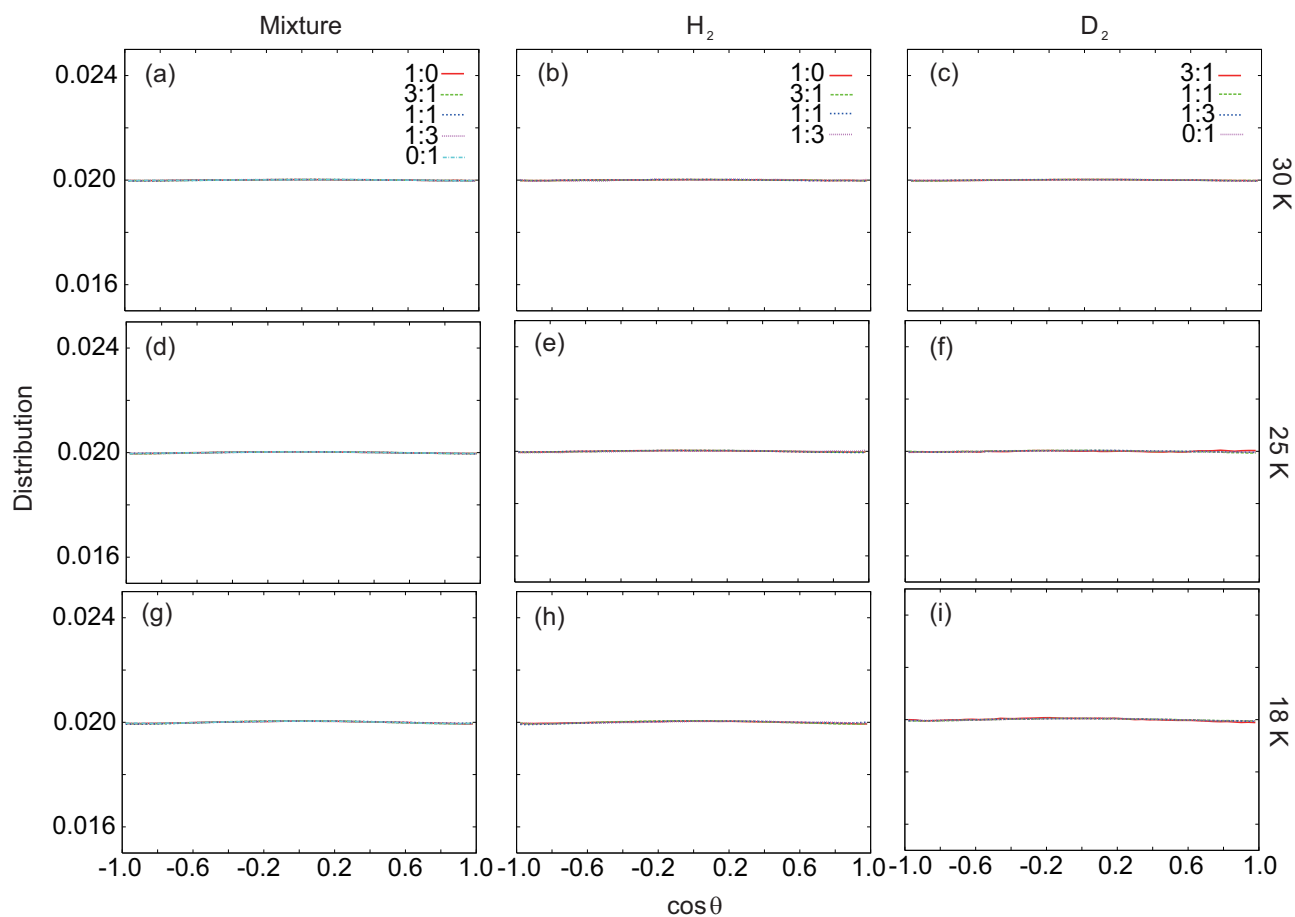

Figure S5: Distributions of the intermolecular angle  $\theta$ , defined by a relative angle formed by a pair of molar vectors of two molecules, at (a)-(c) 30 K, (d)-(f) 25 K and (g)-(i) 18 K. The left panels show  $\theta$  of the mixture including both of  $H_2$  and  $D_2$ , while the center and right panels correspond to  $\theta$ -distributions of only one component,  $H_2$  and  $D_2$ , respectively.

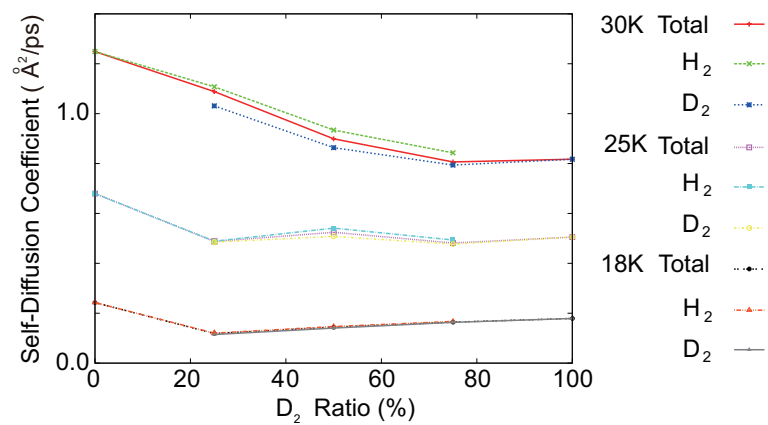

Figure S6: Self-diffusion coefficients of each isotope at the different temperatures as a function of the D<sub>2</sub> ratio.



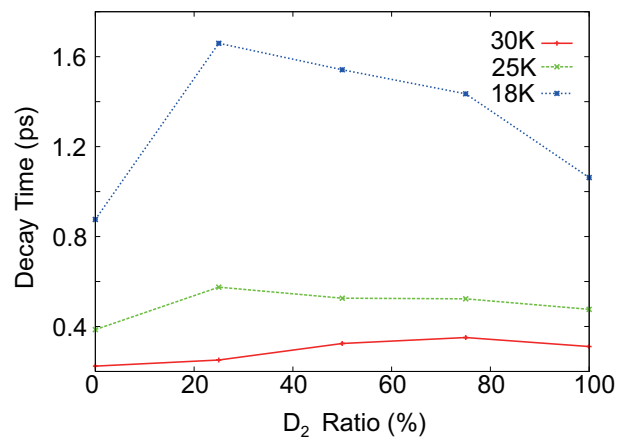

Figure S7: Decay timescales estimated by fitting the long-time time correlation functions(TCFs) of  $\theta(t)$  shown in Fig.3(a)-3(c) with an exponential function.

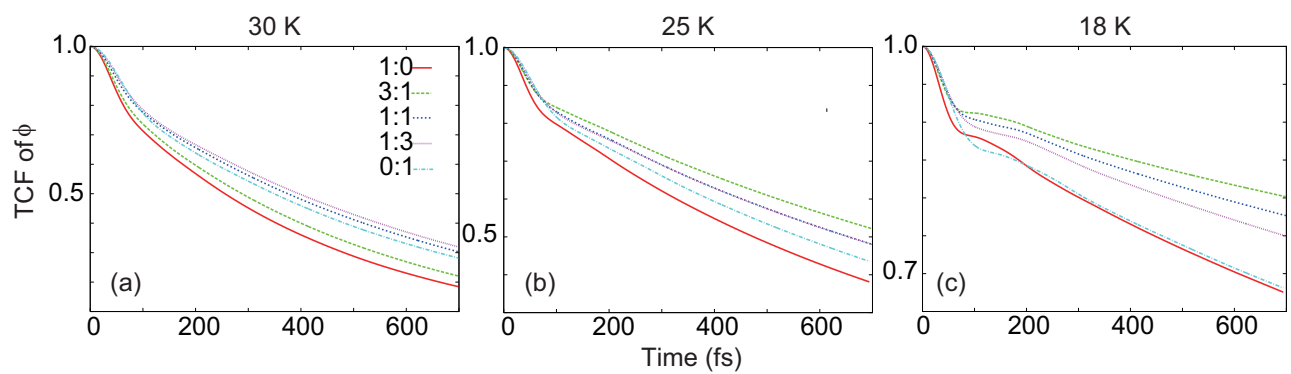

Figure S8: TCFs of the self-orientation of a molecule  $\phi(t)$ , which is defined as a molecular angle projected on the  $xy$ -plane, at (a) 30 K, (b) 25 K and (c) 18 K.

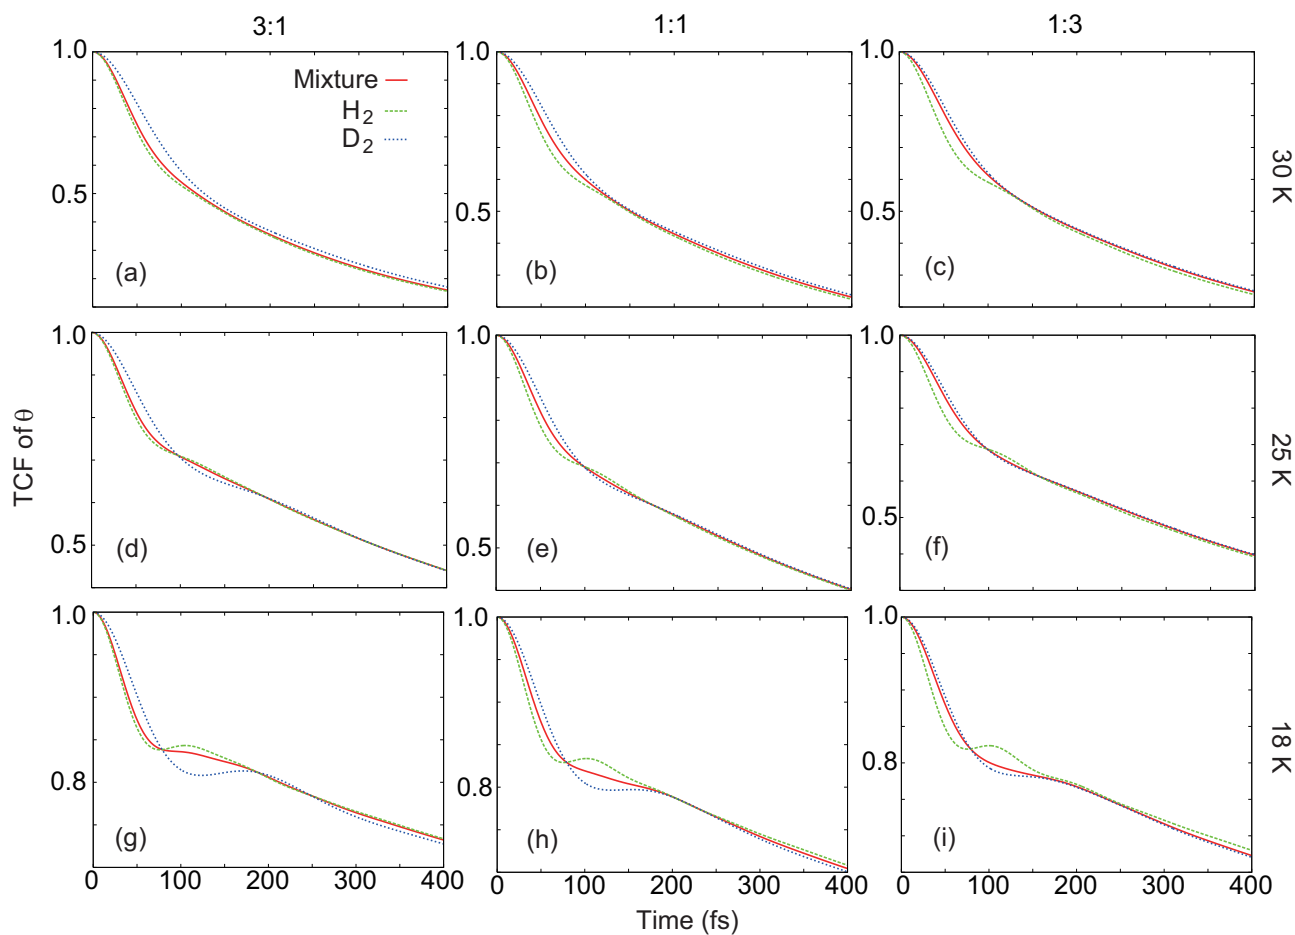

Figure S9:  $\theta$ -TCFs for the 3:1, 1:1 and 1:3 mixtures at (a)-(c) 30 K, (d)-(f) 25 K and (g)-(i) 18 K. Contributions from the total mixture,  $\text{H}_2$  and  $\text{D}_2$  are plotted by the red, green and blue lines, respectively.

## References

- (1) Hyeon-Deuk, K.; Ando, K. Correlations of Intra- and Intermolecular Dynamics and Structure in Liquid Para-Hydrogen. *Phys. Rev. B* **2014**, *90*, 165132.
- (2) Abe, K.; Yamaoka, S.; Hyeon-Deuk, K. Isotopic Effects on Intermolecular and Intramolecular Structure and Dynamics in Hydrogen, Deuterium and Tritium Liquids: Normal Liquid and Weakly and Strongly Cooled Liquids. *J. Phys. Chem. B* **2018**, *122*, 8233–8242.
